# Supplementary material
Source: PubMed Central journal article supplement (PMC6996300)
Supplement: NIHMS1057147-supplement-Supplemental.pdf [file NIHMS1057147-supplement-Supplemental.pdf]

## SUPPLEMENTAL FIGURES AND LEGENDS

**Figure S1**

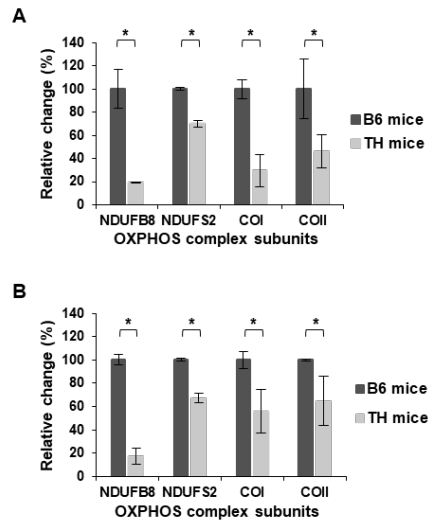

**Figure S1. Expression of mitochondrial OXPHOS complexes I and IV is diminished at various protein concentrations in the liver of TH mice.** **A)** Quantitation of OXPHOS complex subunits NDUFB8 and NDUF52 (complex I) and COI and COII (complex IV) at 5 µg and 10 µg (**B**) in the liver of TH and B6 mice, Western blots shown in Fig. 1A. Results are represented as mean  $\pm$  SD of at least three experiments and presented as a percentage of B6 mice. Statistical analyses were performed using the unpaired Student's *t*-test (2-tailed), \**P* < 0.05. See Figure 1 legend for details.

**Figure S2**

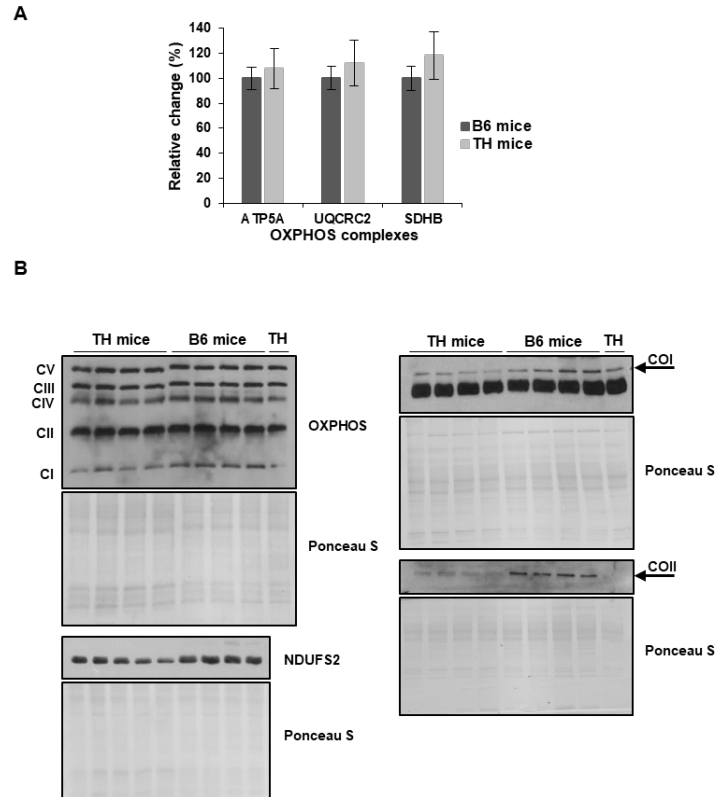

**Figure S2. Mitochondrial OXPHOS complex expression in the liver of TH mice. A)** Quantitation of OXPHOS complex expression in the liver of TH and B6 mice, shown in Fig. 1B. Results are represented as the mean  $\pm$  SD of at least three experiments and presented as a percentage of B6 mice. The unpaired Student's *t*-test (2-tailed) was performed for statistical analysis, and no significant difference was observed in these OXPHOS subunits between the two mouse strains. **B)** Whole Western blots and the corresponding Ponceau S membrane stains for antibodies that show significant changes in the expression between TH and B6 mice. Protein bands for COI and COII are indicated by arrows. See Figure 1 legend for details.

**Figure S3. Sample calculation for complex I and III enzymatic activity assays. A)**

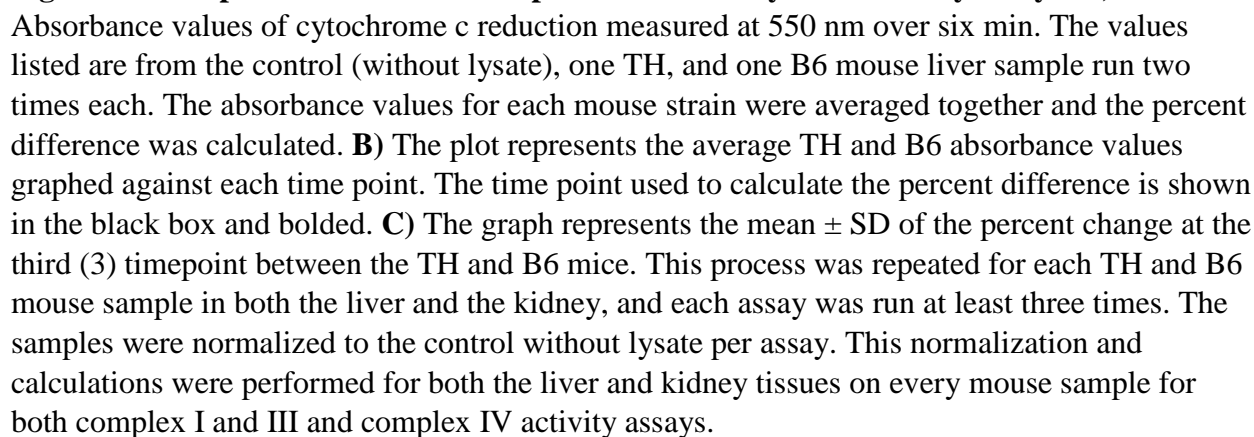

**Figure S4**

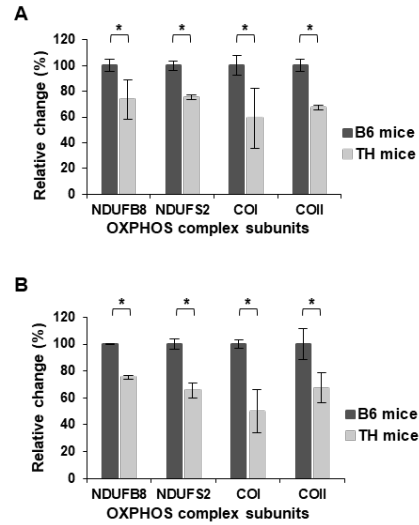

**Figure S4. Expression of mitochondrial OXPHOS complexes I and IV is diminished at various protein concentrations in TH mice kidney.** A) Quantitation of OXPHOS complex subunits of complex I, NDUF8 and NDUF2, and complex IV, COI and COII, at 5 µg and 10 µg (B) in the kidney of TH and B6 mice, Western blots shown in Fig. 3A. Results are represented as mean  $\pm$  SD of at least three experiments and presented as a percentage of B6 mice. Statistical significance was measured by the unpaired Student's *t*-test (2-tailed), \**P* < 0.05. See Fig. 3 legend for details.

**Figure S5**

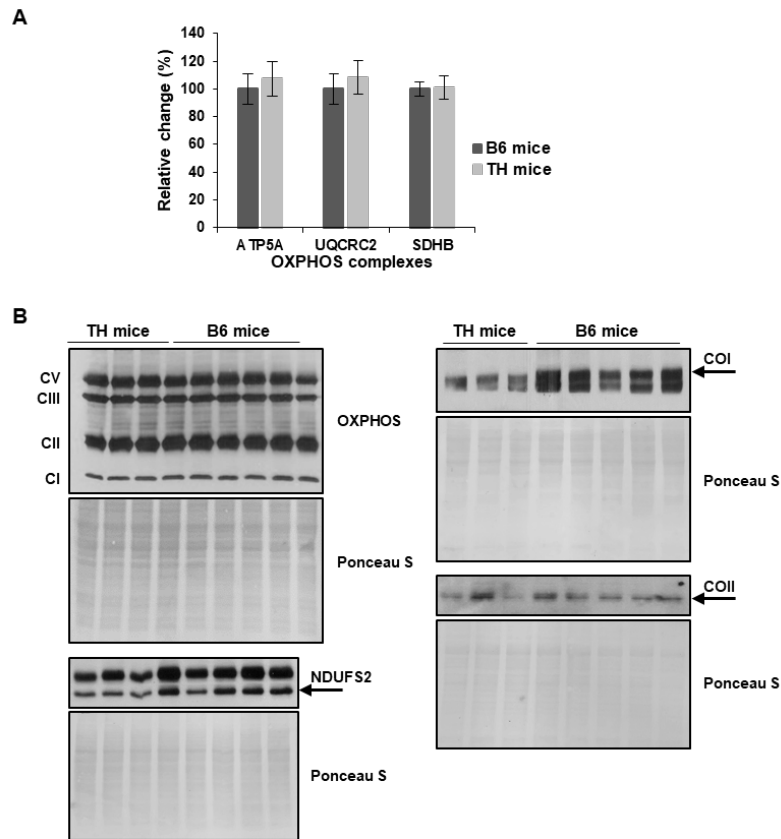

**Figure S5. Expression of mitochondrial OXPHOS complexes in the kidney of TH mice.** **A)** Quantitation of OXPHOS complex expression in the kidney of TH and B6 mice, shown in Fig. 3B. Results are represented as mean  $\pm$  SD of at least three experiments and are presented as a percentage of B6 mice. The unpaired Student's *t*-test (2-tailed) was performed for statistical analysis, and no significant difference was observed in these OXPHOS subunits between the two mouse strains. **B)** The full Western blots and their corresponding Ponceau S stained membranes are shown for each OXPHOS subunit with significant changes in expression. The arrows indicate the COI, COII, and NDUFS2 protein bands for the TH and B6 mice kidney samples. See Fig. 3 legend for details.
